1 Proteomics as a metrological tool to evaluate genome annotation accuracy  
2 following *de novo* genome assembly: a case study using the Atlantic bottlenose  
3 dolphin (*Tursiops truncatus*)

4

5 Benjamin A. Neely<sup>1,\*</sup>, Debra L. Ellisor<sup>2</sup>, W. Clay Davis<sup>1</sup>

6

7

8 <sup>1</sup> National Institute of Standards and Technology, Material Measurement Laboratory, Chemical Sciences  
9 Division, Marine Biochemical Sciences Group, Hollings Marine Laboratory, 331 Fort Johnson Road,  
10 Charleston, SC 29412, United States

11 <sup>2</sup> National Institute of Standards and Technology, Material Measurement Laboratory, Chemical Sciences  
12 Division, Environmental Specimen Bank Group, Hollings Marine Laboratory, 331 Fort Johnson Road,  
13 Charleston, SC 29412, United States

14

15

16

17

18

19

20 \* Corresponding Author: [benjamin.neely@nist.gov](mailto:benjamin.neely@nist.gov)

21 Keywords: *de novo* genome, genome accuracy, proteomics, Atlantic bottlenose dolphin (*Tursiops*  
22 *truncatus*), marine mammal

23 **Abstract**

24 *Background*

25 The last decade has witnessed dramatic improvements in whole-genome sequencing capabilities coupled  
26 to drastically decreased costs, leading to an inundation of high-quality *de novo* genomes. For this reason,  
27 continued development of genome quality metrics is imperative. The current study utilized the recently  
28 updated Atlantic bottlenose dolphin (*Tursiops truncatus*) genome and annotation to evaluate a  
29 proteomics-based metric of genome accuracy.

30

31 *Results*

32 Proteomic analysis of six tissues provided experimental confirmation of 10 402 proteins from 4 711  
33 protein groups, almost 1/3 of the possible predicted proteins in the genome. There was an increased  
34 median molecular weight and number of identified peptides per protein using the current *T. truncatus*  
35 annotation versus the previous annotation. Identification of larger proteins with more identified peptides  
36 implied reduced database fragmentation and improved gene annotation accuracy. A metric is proposed,  
37 NP<sub>10</sub>, that attempts to capture this quality improvement. When using the new *T. truncatus* genome there  
38 was a 21 % improvement in NP<sub>10</sub>. This metric was further demonstrated by using a publicly available  
39 proteomic data set to compare human genome annotations from 2004, 2013 and 2016, which had a 33 %  
40 improvement in NP<sub>10</sub>.

41

42 *Conclusions*

43 These results demonstrate that new whole-genome sequencing techniques can rapidly generate high  
44 quality *de novo* genome assemblies and emphasizes the speed of advancing bioanalytical measurements  
45 in a non-model organism. Moreover, proteomics may be a useful metrological tool to benchmark genome  
46 accuracy, though there is a need for reference proteomic datasets to facilitate this utility in new *de novo*  
47 and existing genomes.

## 48 **Background**

49           Since 2007 there has been a rapid decrease in whole-genome sequencing costs coupled with  
50 improved read lengths and development of long-range techniques such as synthetic long-reads and  
51 mapping protocols. Concurrently, the access to high performance computing environments has improved  
52 along with an endless supply of new genome assembly and annotation tools. With these new resources it  
53 is now possible to rapidly generate high-quality *de novo* genomes for non-model organisms. Excellent  
54 examples of this are two recently completed mammalian genomes (the domestic goat, *Capra hircus* [1, 2],  
55 and the Hawaiian monk seal, *Neomonachus schauinslandi* [3]) that utilized a combination of approaches  
56 including optical mapping, synthetic long reads, long read technology and chromatin interaction mapping  
57 to generate highly contiguous (scaffold N50 > 29.5 Mbp) *de novo* genomes at a relatively low cost.  
58 Overall, the result of these parallel advancements are numerous large-scale sequencing projects [4], the  
59 most ambitious targeting approximately 9 000 eukaryotic species (Earth BioGenome Project). With the  
60 forthcoming inundation of new high-quality *de novo* genomes, there is a continued need for improved  
61 metrics to evaluate genome accuracy.

62           Genome assemblies and annotations are evaluated in terms of contiguity and completeness, both  
63 indicators of genome accuracy. Measures of contiguity, such as scaffold N50 or N90 length, typically  
64 correspond to the quality of the genome assembly [5]. Scaffold N50 or N90 length is similar to a median  
65 or quantile scaffold length but is dependent on assembly size. Greater scaffold contiguity tends to result in  
66 more protein-coding sequences and isoforms. For example, one of the initial finished human genome  
67 assemblies from 2004 (NCBI Build 34) had a scaffold N50 of 27.2 Mbp and 27 180 protein-coding  
68 sequences, which has since been improved to a scaffold N50 of 59.4 Mbp and 109 018 protein-coding  
69 sequences (NCBI Release 108, March 2016). Gains can be even more pronounced in non-model  
70 organisms with improved *de novo* genome assemblies. For example, the *Alligator mississippiensis*  
71 (American alligator) genome recently improved from a scaffold N50 of 508 kbp to 10 Mbp using new  
72 sequencing methods [6]. Similarly, the focus of this study, *Tursiops truncatus* (Atlantic bottlenose  
73 dolphin), improved from a scaffold N50 of 116 kbp to 26.6 Mbp. Studies have shown that assembly

74 contiguity often corresponds to assembly quality [5] but does not necessarily correlate with genome  
75 completeness and therefore accuracy [7]. One way to evaluate genome completeness is by using predicted  
76 conserved gene products. First used in the Core Eukaryotic Genes Mapping Approach (CEGMA) [8, 9],  
77 this concept has developed into Benchmarking Universal Single-Copy Orthologs (BUSCO), which is a  
78 content-based quality assessment that uses universal single-copy markers to gauge genome completeness  
79 [7]. It is evident that using many metrics to benchmark *de novo* genomes is essential to evaluating  
80 genome quality. Given the orthogonal nature of proteomics and its dependence on accurately predicted  
81 gene annotations, a quality metric based in this analytical domain may be advantageous.

82         Data-dependent acquisition bottom-up shotgun proteomics is one method to confirm gene  
83 annotations by observing the predicted proteins using mass spectrometry. First, proteins are digested with  
84 a known protease and the resulting peptides are fragmented within a mass spectrometer. Next, using an  
85 accurate mass of the peptide and the resulting fragmentation pattern, search algorithms can  
86 probabilistically identify peptides and then infer proteins in the search database. Alternatively, spectral  
87 libraries directly match fragmentation patterns, though these initial assignments are typically made using  
88 database-dependent approaches [10-12]. With the current generation of mass spectrometers, which have  
89 high duty cycles with high mass accuracy and resolution, we may be approaching the era of being able to  
90 infer the majority of proteins in a genome. For example, a recent proteomic analysis of HeLa tissue  
91 accounted for 91.5 % of gene products measured in the same tissue by RNA-seq (12 209 protein coding  
92 sequences versus 13 347 gene products) [13]. Since bottom-up shotgun proteomics relies completely on a  
93 database for peptide identifications and protein inference, it may be possible that a high-quality mass  
94 spectrometric dataset could be used to benchmark genome assembly and annotation quality.

95         The purpose of the current study was two-fold: (i) provide detailed proteomic profiling of a  
96 marine mammal and (ii) use this data to evaluate the new *T. truncatus* assembly and annotation. On  
97 average over 4 800 proteins were identified in six different tissues, and when combined yielded 10 402  
98 protein identifications. Although not an exhaustive proteomic dataset, it confirmed approximately 1/3 of  
99 the predicted protein-coding genes. This dataset is an invaluable resource to support comparative

100 proteomics in diving mammals related to comparative evolution [14] and biomimicry [15] and  
101 demonstrates the feasibility of accelerating cutting-edge bioanalytical approaches in non-model  
102 organisms. Secondly, the new *de novo* assembly resulted in increased protein identifications but also a  
103 decreased number of peptide identifications, despite more than a 200-fold improvement in scaffold N50  
104 over the previous assembly. We investigated these differences at the peptide and protein level to identify  
105 global trends and proposed a new measure of genome annotation quality, NP<sub>10</sub>. This new measure was  
106 further demonstrated by evaluating human genome improvements over the past decade using publicly  
107 available proteomic data. Overall, these results highlight the improved annotation accuracy of the new *T.*  
108 *truncatus* genome, the utility of proteomics as a metrological tool for evaluating genome annotation  
109 quality, and emphasizes the need for reference proteomic datasets to facilitate metrology in new and  
110 existing genomes.

111

## 112 **Results**

### 113 *Proteomic analysis of six tissues using NIST\_Tur\_tru v1*

114 The initial goal of this study was to advance metrological capabilities in *T. truncatus*. This was  
115 accomplished by demonstrating proteomic measurements of six tissues from *T. truncatus*. On average, 2  
116 199 protein groups and 4 888 proteins were identified in each tissue. The reason for performing proteomic  
117 analysis on multiple tissue types was to capture more of the possible protein population. Although there  
118 were 1 310 protein identifications shared across tissues, there was also diversity in protein identifications  
119 between tissues with the brain and skin analyses having the most unique proteins (Figure 1). Proteomic  
120 results for each tissue are available (Additional File Tables S6 –S11). It is interesting to note that the liver,  
121 kidney and blubber came from the individual used for whole-genome sequencing. This dataset is  
122 relatively diverse and provides experimental evidence for over 32 000 proteotypic peptides.

123

### 124 *Comparison of Ttru\_1.4 and NIST\_Tur\_tru v1*

125 The second goal of the current study was to evaluate the new *T. truncatus de novo* genome assembly  
126 (GCA\_001922835.1) and annotation (NIST\_Tur\_tru v1). This genome assembly was generated in the fall  
127 of 2016 using shotgun sequencing coupled to an *in vitro* histone ligation-based sequencing method (*i.e.*,  
128 Chicago method) and proprietary assemblers described in detail by Putnam *et al.* [6]. This process  
129 resulted in a genome assembly with a scaffold N50 of 26.6 Mbp. Of the 159 species with genomes  
130 currently deposited on NCBI, 41 have scaffold N50 values greater than 26.6 Mbp. This level of contiguity  
131 is becoming more commonplace with three marine mammal genomes released in 2017 with scaffold N50  
132 greater than 19 Mbp (*T. truncatus*, *Neomonachus schauinslandi*, Hawaiian monk seal [3], and  
133 *Delphinapterus leucas*, beluga whale [16]). For comparison, the prior NCBI *T. truncatus* annotation  
134 (Ttru\_1.4) was used. This assembly was a 2012 update [14] to the 2008 draft assembly based on Sanger  
135 sequencing, Ttru\_1.2 [17].

136 Both Ttru\_1.4 and NIST\_Tur\_tru v1 are publicly available on NCBI and have been annotated  
137 using NCBI's eukaryotic annotation pipeline and made available in RefSeq [18]. The current annotation  
138 release, release 101 based on NIST\_Tur\_tru v1, has 24 026 genes and pseudogenes and 17 096 protein-  
139 coding genes with 38 849 coding sequences. At the gene and transcript level, there were many changes  
140 from Ttru\_1.4 that are delineated based on alignment of genes and transcripts: identical, minor changes,  
141 major changes, new, deprecated and other. These categories are defined and available through NCBI's  
142 annotation report [19]. Briefly, 28 % of the prior genes and transcripts in Ttru\_1.4 were deprecated, 72 %  
143 had minor or major changes, and 21 % of the genes and transcripts in the NIST release are new.  
144 Additionally, a small group of proteins have the prefix YP, which is not included in these NCBI  
145 categories.

146 Tandem mass spectrometry data collected from all six tissues was searched against each release.  
147 For both releases, almost 1/3 of the predicted protein-coding sequences were inferred by mass  
148 spectrometry. Specifically the NIST assembly identified 32 582 peptide groups belonging to 10 402  
149 proteins comprising 4 711 protein groups. The Ttru\_1.4 assembly identified 33 738 peptide groups  
150 belonging to 6 899 proteins comprising 5 292 protein groups. Many of the differences between the two

151 results were due to a loss of deprecated sequences and minor/major changes (Figure 2). Broadly, these  
152 changes resulted in larger proteins with an increased median molecular weight and NP<sub>10</sub> molecular  
153 weight.

154

#### 155 *Confirming improvements in gene annotation*

156 There were 4,695 protein-coding sequences in the Ttru\_1.4 annotation listed as partial, and one of the  
157 main improvements in the new NIST annotation was that 86 % of these sequences were merged into  
158 complete sequences. This offered an opportunity to evaluate the accuracy of these new assignments by  
159 determining whether peptides identified by mass spectrometry supported the new complete sequences. Of  
160 6 899 identified proteins using Ttru\_1.4, 1 249 were partials. Of these 1 249 partial proteins identified  
161 using Ttru\_1.4, 534 had minor changes, 256 major, 450 were deprecated and 9 were other (defined simply  
162 as other changes [19]). When this NIST annotation was used, 1 005 of these same 1 249 proteins were  
163 identified, with 985 no longer being listed as partial. The median improvement within each protein was  
164 two additional unique peptides and overall the median molecular weight improved 1.8-fold (Figure 3). Of  
165 these 1 005 partial proteins identified using Ttru\_1.4, when using the NIST annotation, 886 had increased  
166 molecular weight and increased number of unique peptides.

167

#### 168 *Comparing peptide identifications*

169 An unexpected result in the new annotation was that there were fewer peptide identifications. Given the  
170 major changes between the two releases related to deprecated genes, new genes, and major changes, we  
171 were interested in tracking these peptide level changes. Over 80 % of the peptide groups identified in  
172 NIST annotation were also identified using the Ttru\_1.4 annotation (Figure 4). The new peptide  
173 identifications were linked to major and minor changes in genes with only 3.2 % due to new sequences.  
174 As would be expected, many of the peptide groups not identified in the NIST annotation were deprecated  
175 (41 %). Given that these 5 657 peptide groups lost using the NIST annotation were high-confidence

176 identifications, it may provide evidence for re-inclusion of these protein-coding sequences in future  
177 annotation releases.

178

### 179 *Specific examples of annotation improvements*

180 The goal of evaluating differences at a broad level is to capture and describe relevant changes at the  
181 granular level. At the peptide level, one the most striking improvements was related to titin, a major  
182 component in muscle tissue. In Ttru\_1.4, titin (XP\_004322250.1) was a partial sequence of 2,167 amino  
183 acids (241.7 kDa) and 60 unique peptides (40.2 %) were identified belonging to this sequence. In the  
184 NIST annotation, the coding sequence for titin (XP\_019787158.1) was 32 192 amino acids (3 812.8 kDa)  
185 and 779 unique peptides (34.3 % coverage) were identified belonging to this sequence. This single  
186 sequence improvement is responsible for many changes observed at the peptide level (Figure 4).

187         Almost 2 % of the identified proteins using the NIST annotation were considered new. One  
188 important new protein of note is cystatin C (XP\_019783122.1). This protein was not present in Ttru\_1.4,  
189 while using the NIST annotation the mass spectrometry data identified three unique peptides (41.3 %  
190 coverage) belonging to the predicted 13.1 kDa protein. This protein has applications as a biomarker [20],  
191 and with these proteomic results, it is possible to create SI traceable mass spectrometer-based assays  
192 (similar to [21]). Another protein of note is serotransferrin (XP\_019789750.1), which is 90 % identical  
193 and 3.5 % longer than the entry in Ttru\_1.4 annotation (XP\_004329553.1). Most of these changes were  
194 on the c-terminus section (from positions 537 to 634), which was supported by the proteomic data that  
195 identified four peptides spanning this region. There were other slight changes to the sequence that resulted  
196 in six more unique peptides identified in the improved serotransferrin, which supports the accuracy of the  
197 new annotation. Overall, there are many changes related to the over 10 000 protein identifications and  
198 many would be considered improvements as indicated by increased protein molecular weight and/or  
199 greater peptide coverage. At a gene-by-gene level these results can be used to confirm and improve  
200 annotations.

201



202 *Confirming quality metric in human annotations*

203 In order to gauge the broader applicability of using proteomics as a quality measure of genomic  
204 annotations, we demonstrated NP<sub>10</sub> in a more mature genome with deeper proteomics. The recent work by  
205 Bekker-Jensen *et al.* [13] is publicly available on ProteomeXchange [22, 23] and for this comparison the  
206 data generated from a 39 fraction high pH pre-fractionation of a HeLa cell digest followed by LC-MS/MS  
207 analysis was used for database searching. These data were searched against three human genome  
208 annotations from 2004, 2013 and 2016, each with markedly increased scaffold N50 values and database  
209 sizes (*i.e.*, number of coding-sequences; Table 1). The number of identified proteins was 13 341, 22 906,  
210 and 48 019 proteins in Build 34, Release 105 and Release 108, respectively. The median molecular  
211 weight improved 25 % (from 51.06 to 53.46 to 63.99 kDa, respectively) whereas the improvement in  
212 NP<sub>10</sub> was more pronounced with a 33 % improvement (from 100.17 to 101.87 to 133.55 kDa,  
213 respectively; Figure 5).

214

215 **Table 1. Descriptive statistics of human annotated databases and resulting proteomic**  
216 **identifications.**

|                                 | <b>Build 34</b> | <b>Release 105</b> | <b>Release 108</b> |
|---------------------------------|-----------------|--------------------|--------------------|
| <b>release date</b>             | Feb 2004        | Jun 2013           | Mar 2016           |
| <b>scaffold N50</b>             | 29.1 Mbp        | 45.0 Mbp           | 59.4 Mbp           |
| <b>coding sequences</b>         | 27 180          | 45 107             | 109 018            |
| <b>protein groups</b>           | 9 762           | 10 059             | 10 219             |
| <b>proteins</b>                 | 13 341          | 22 906             | 48 019             |
| <b>peptide groups</b>           | 175 895         | 184 580            | 184 806            |
| <b>peptide spectral matches</b> | 390 909         | 405 852            | 405 950            |

217

218

219

## 220 Discussion

221 Advances in bioanalytical platforms across domains (*i.e.*, genomics, transcriptomics, and  
222 proteomics) are improving the accessibility of non-model organisms as viable research candidates. The  
223 results of the current study provide secondary confirmation of 10 402 proteins from 4 711 protein groups  
224 using a recently completed well-scaffolded high-coverage *T. truncatus* genome and shotgun proteomic  
225 analysis of six different tissues. Previous proteomic studies of *T. truncatus* have identified less than 100  
226 protein groups in serum [15, 21], while the most detailed published proteomic analysis of a marine  
227 mammal identified 206 proteins in cerebrospinal fluid of *Zalophus californianus* (California sea lion)  
228 [24]. Currently there are twelve marine mammal genomes that have been annotated by NCBI (of the 159  
229 species with genomes currently deposited on NCBI), though only *T. truncatus* and *Z. californianus* have  
230 published mass spectrometry based proteomic datasets. Work is underway to increase the number of  
231 marine mammal genomes along with companion high-quality proteomic datasets and spectral libraries.  
232 The results of the current study provide empirical confirmation of protein annotations, including  
233 observable proteotypic peptides, which can be a resource for future targeted studies in *T. truncatus*. For  
234 example, by improving the protein-coding sequence accuracy of serotransferrin in *T. truncatus*, future  
235 studies can extrapolate metrological advances in human serotransferrin sialoforms [25] to *T. truncatus*  
236 disease treatment [26]. Since the current results are not an exhaustive proteomic dataset, future studies  
237 will utilize different solubilization techniques, proteases, and separation techniques to provide even  
238 deeper proteome coverage (reviewed and demonstrated in the following [13, 27, 28]). Still, it is worth  
239 noting that in single study using a simple experimental approach we have identified almost 1/3 of the  
240 possible predicted proteins, emphasizing the ease of accomplishing bioanalytical advances in non-model  
241 organisms using modern techniques.

242 In the current study, benchmark proteomic datasets were used to evaluate genome assembly and  
243 annotation improvements in *T. truncatus* and *H. sapiens*. Typically, a reference database is used to  
244 demonstrate proteomic improvements due to optimized protein extraction, solubilization and digestion,  
245 peptide separation, mass spectrometer speed and mass accuracy, search algorithm performance and

246 database accuracy. In contrast, when the mass spectrometric data are held constant and instead the  
247 database is varied, differences in proteomic results are indicative of database fragmentation and accuracy.  
248 Proteomic analysis of multiple tissues allowed for greater protein diversity when evaluating *T. truncatus*,  
249 though the publicly available human data performed exceptionally well despite using a single tissue since  
250 it utilized highly optimized separation techniques. An optimum proteomic benchmark dataset would be  
251 one that offers the possibility of the deepest proteome coverage. This would rely on using multiple  
252 tissues, extraction protocols, enzymes and optimum separation techniques coupled to modern mass  
253 spectrometers. These datasets could be developed in parallel to the exponential increase in *de novo*  
254 genomes being released and annotated and would prove invaluable in exercises assessing assembly and  
255 annotation performance (such as Assemblathon 2 [5]). Importantly, given the abundance and accessibility  
256 of public proteomic data in this “Golden Age of Proteomics” (as coined by [29]) and modular open-access  
257 proteogenomic pipelines such as Galaxy-P [30, 31], it would be possible to incorporate these reference  
258 mass spectrometric datasets and proteomic derived quality metrics into genome assembly and annotation  
259 pipelines.

260 In parallel to improvements in genome assembly contiguity and annotation accuracy, proteomic  
261 results should have increased peptide numbers per protein, higher protein identifications due to isoform  
262 resolution and improved coverage of higher molecular weight proteins due to better long-range accuracy.  
263 For instance, when evaluating the substantial reduction in partial sequences between Ttru\_1.4 and  
264 NIST\_Tur\_tru v1, there was an increase of 81 % in median molecular weight of these proteins that  
265 coincided with more peptide identifications within these new complete sequences. The most drastic  
266 example in this case study was titin, which went from 60 to 779 identified peptides with the addition of  
267 over 32 000 amino acids to the previously partial sequence. This also emphasizes that greater numbers of  
268 protein identifications does not imply higher quality since a more fragmented genome will give more  
269 protein identifications. Instead, identification of larger proteins with more identified peptides is more  
270 indicative of improved quality. The proposed metric, NP<sub>10</sub>, attempts to capture this quality measure. One  
271 issue is that the NP<sub>10</sub> may be glossing over how changes in spectral assignments to peptides with

272 changing databases affect proteomic quality (such as false discovery rates). There is an opportunity to  
273 develop a streamlined method to track MS/MS spectra assignments and quantify those changes with  
274 database improvements in order to establish finer measures of search space effects on proteomic  
275 performance. Overall, these results demonstrate that new whole-genome sequencing techniques can  
276 provide high quality *de novo* genome assemblies and that proteomics is a useful metrological tool to  
277 evaluate annotation and benchmark genome accuracy.

278

## 279 **Methods**

### 280 *Sample source and preparation*

281 Bottlenose dolphin tissues were collected from animals under appropriate permits (Additional File Table  
282 S1) and stored at liquid nitrogen temperatures (-150 to -180 °C) until cryohomogenization in the National  
283 Institute of Science and Technology's Marine Environmental Specimen Bank [32]. From the resulting  
284 fine powder, 5 mg was subsampled and the proteins were extracted using RapiGest (Waters, Milford  
285 MA). Briefly, 150 µL of 0.1 % (w/v) RapiGest (in 50 mM ammonium bicarbonate) was added, resulting  
286 in a solution of 33 µg/µL tissue. The extraction mixture was shaken at 600 rpm for 25 min at room  
287 temperature followed by removal of large debris using a benchtop microcentrifuge. From this solution, a  
288 5 µL aliquot was removed and suspended in 35 µL of 0.1 % (w/v) RapiGest (in 50 mM ammonium  
289 bicarbonate), followed by the addition of 40 µL of 50 mM ammonium bicarbonate. Next, the sample was  
290 reduced with 10 µL of 45 mM dithiothreitol (DTT; final concentration of 5 mM) and incubated at 60 °C  
291 for 30 min, then allowed to cool to room temperature. The mixture was alkylated using 3.75 µL of 375  
292 mM iodoacetamide (Pierce, Thermo Scientific, Waltham, MA; final concentration of 15 mM) and  
293 incubated in the dark at room temperature for 20 min. Prior to addition of trypsin, 100 µL of 50 mM  
294 ammonium bicarbonate was added. A 3.3 µL aliquot of trypsin (MS-Grade; 1 µg/µL in 50 mM acetic acid)  
295 was added (1:50 trypsin:protein) and samples were incubated overnight at 37 °C. The digestion was  
296 halted and RapiGest cleaved with the addition of 100 µL of 3 % (v/v) trifluoroacetic acid (1% final

297 concentration) and incubated at 37 °C for 30 min before centrifugation and removal of the supernatant.  
298 Samples were processed using Pierce C18 spin columns (8 mg of C18 resin; Thermo Scientific) according  
299 to manufacturer's instructions. Each sample was processed in duplicate yielding at maximum of 60 µg  
300 peptides. These solutions were evaporated to dryness in a vacufuge then reconstituted in 150 µL of 5 %  
301 acetonitrile in water.

302

### 303 *Mass Spectrometry*

304 Samples were analyzed using an UltiMate 3000 Nano LC coupled to a Fusion Lumos mass spectrometer  
305 (Thermo Fisher Scientific). Resulting peptide mixtures (10 µl) were loaded onto a PepMap 100 C18 trap  
306 column (75 µm id x 2 cm length; Thermo Fisher Scientific) at 3 µL/min for 10 min with 2 % (v/v)  
307 acetonitrile and 0.05 % (v/v) trifluoroacetic acid followed by separation on an Acclaim PepMap RSLC 2  
308 µm C18 column (75µm id x 25 cm length; Thermo Fisher Scientific) at 40 °C. Peptides were separated  
309 along a 130 min gradient of 5 % to 27.5 % mobile phase B [80 % (v/v) acetonitrile, 0.08 % (v/v) formic  
310 acid] over 105 min followed by a ramp to 40 % mobile phase B over 15 min and lastly to 95 % mobile  
311 phase B over 10 min at a flow rate of 300 nL/min. The mass spectrometer was operated in positive  
312 polarity and data dependent mode (topN, 3 s cycle time) with a dynamic exclusion of 60 s (with 10 ppm  
313 error). The RF lens was set at 30 %. Full scan resolution using the orbitrap was set at 120 000 and the  
314 mass range was set to  $m/z$  375 to 1500. Full scan ion target value was 4.0e5 allowing a maximum injection  
315 time of 50 ms. Monoisotopic peak determination was used, specifying peptides and an intensity threshold  
316 of 1.0e4 was used for precursor selection. Data-dependent fragmentation was performed using higher-  
317 energy collisional dissociation (HCD) at a normalized collision energy of 32 with quadrupole isolation at  
318  $m/z$  0.7 width. The fragment scan resolution using the orbitrap was set at 30 000,  $m/z$  110 as the first  
319 mass, ion target value of 2.0e5 and a 60 ms maximum injection time.

### 320 *Protein Search parameters*

321 Resulting raw files from the analysis of six different *T. truncatus* tissues and raw files from a publicly  
322 available 39 fraction HeLa experiment (ProteomeXchange Consortium [23] via the PRIDE partner  
323 repository with the dataset identifier PXD004452) were processed and searched using Proteome  
324 Discoverer (v.2.0.0.802). For *T. truncatus* analysis, Sequest HT and Mascot (v2.6.0; Matrix Science)  
325 search algorithms were used, while only Sequest HT was used for human searches. For all searches, the  
326 protein.faa fasta file was retrieved from NCBI RefSeq [18] via ftp [33]. For searches with the prior *T.*  
327 *truncatus* annotation, GCF\_000151865.2\_Ttru\_1.4 was used, while searches with the current *T. truncatus*  
328 annotation, GCF\_001922835.1\_NIST\_Tur\_tru\_v1 was used. These correspond to release 100 and 101 for  
329 this organism on NCBI. The whole-genome sequencing projects can be found in GenBank [34] under  
330 entries ABRN00000000.2 (Ttru\_1.4) and MRVK00000000.1 (NIST\_Tur\_tru\_v1). For the human  
331 searches, the following were used: GCF\_000001405.10\_hg16\_Build34.3 (Build 34),  
332 GCF\_000001405.25\_GRCh37.p13 (Release 105) and GCF\_000001405.33\_GRCh38.p7 (Release 108).  
333 The *T. truncatus* searches also used the common Repository of Adventitious Proteins database (cRAP;  
334 2012.01.01; the Global Proteome Machine), though these sequences were removed from search results.

335 The following search parameters were used for Mascot and Sequest: trypsin was specified as the  
336 enzyme allowing for two mis-cleavages; carbamidomethyl (C) was fixed and acetylation (protein n-term),  
337 deamidated (NQ), pyro-Glu (n-term Q), and oxidation (M) were variable modifications; 10 ppm precursor  
338 mass tolerance and 0.02 Da fragment ion tolerance. Within Sequest, the peptide length was specified as a  
339 minimum of six and maximum of 144 amino acids. Resulting peptide spectral matches were validated  
340 using the percolator algorithm, based on q-values at a 1 % false discovery rate (FDR). The peptides that  
341 were greater than six amino acids long were grouped into proteins according to the law of parsimony and  
342 filtered to 1 % FDR and single peptide hits were allowed. Briefly, there may be more than one peptide  
343 spectral match for a given peptide, which are then grouped to peptide groups. Protein inference is when  
344 these peptide groups are assigned to proteins, but given similarity between some proteins (such as  
345 isoforms or highly homologous sequences), peptides can match to more than one protein. For this reason,  
346 protein families or protein groups are generated based on peptide overlap (and therefore sequence

347 overlap), which reduces inflation due to isoform identifications. For the described analyses, protein and  
348 peptide groups are used and are available for each *T. truncatus* search in Additional File Tables S2 – S5.  
349 Raw MS data and Mascot based search results for *T. truncatus*, as well as all fasta databases, have been  
350 deposited to the ProteomeXchange Consortium [23] via the PRIDE partner repository with the dataset  
351 identifier PXD008808 and 10.6019/PXD008808.

352

### 353 *Proteomic-based quality metric for annotation quality*

354 Evaluating proteomic results relies on qualifying how well a database explains the observed tandem mass  
355 spectra: high numbers of protein identifications and percent identified spectra indicate good proteomic  
356 performance. Another way of describing proteomic results is to plot the number of peptide identifications  
357 versus protein molecular weight. A larger protein has potentially more peptide identifications but due to  
358 solubilization and digestion effects (such as post-translational modifications and protein folding), larger  
359 proteins do not always yield more unique peptides. For this reason, there is a somewhat Gaussian  
360 distribution of peptide frequency around median protein molecular weight. This median can shift right  
361 when the molecular weight of predicted protein-coding sequences increases and/or the number of  
362 isoforms increases.

363       When evaluating and comparing *de novo* genome assemblies and annotations, the specific  
364 question that proteomics can answer is the degree of database fragmentation and accuracy. If an  
365 annotation improves partial coding sequences to complete protein-coding sequences with isoforms, then  
366 there will be an increase in the molecular weight of identified proteins with more peptides assigned to  
367 these longer sequences. By simply improving partial sequences there would be a shift to higher protein  
368 molecular weight. One goal of the current study was to provide a more robust quality measure by  
369 incorporating unique peptide counts (which corresponds to protein coverage) with the change of median  
370 molecular weight of inferred proteins. The NP<sub>10</sub> is a proposed metric that first stratifies the results by  
371 identifying the top decile (or 10<sup>th</sup> 10-quantile) of proteins based on the number of peptides per protein and  
372 then returns the median molecular weight of the resulting proteins (graphically demonstrated in

373 Additional File Figure S1). This metric is similar to simply calculating the median molecular weight of all  
374 inferred proteins, but by removing protein identifications with relatively few peptide assignments, it  
375 attempts to indicate accuracy of the improved/longer protein-coding sequences.

376

377

### 378 **Availability of supporting data**

379 The raw data and tissue specific search results along with all databases used are available at the  
380 ProteomeXchange Consortium [23] via the PRIDE partner repository with the dataset identifier  
381 PXD008808 and 10.6019/PXD008808. The proteomic data from Bekker-Jensen *et al.* [13] used for the  
382 human comparison can be found at ProteomeXchange Consortium [23] via the PRIDE partner repository  
383 with the dataset identifier PXD004452. Tabulated search results for combined analysis and for each tissue  
384 can be found in Additional File Supplemental Tables S1-S11.

385 Additional File Figure S1. Graphical example of NP<sub>10</sub> calculation.

386 Additional File Table S1. Sample characteristics table.

387 Additional File Table S2. Protein Identifications using Ttru\_1.4.

388 Additional File Table S3. Protein Identifications using NIST\_Tur\_tru v1.

389 Additional File Table S4. Peptide Group Identifications using Ttru\_1.4.

390 Additional File Table S5. Peptide Group Identifications using NIST\_Tur\_tru v1.

391 Additional File Table S6. Protein Identifications in blubber tissue using NIST\_Tur\_tru v1.

392 Additional File Table S7. Protein Identifications in brain tissue using NIST\_Tur\_tru v1.

393 Additional File Table S8. Protein Identifications in kidney tissue using NIST\_Tur\_tru v1.

394 Additional File Table S9. Protein Identifications in liver tissue using NIST\_Tur\_tru v1.

395 Additional File Table S10. Protein Identifications in muscle tissue using NIST\_Tur\_tru v1.

396 Additional File Table S11. Protein Identifications in skin tissue using NIST\_Tur\_tru v1.

397

398



399 **Declarations**

400 **List of abbreviations**

|     |                  |                                                                                                     |
|-----|------------------|-----------------------------------------------------------------------------------------------------|
| 401 | BUSCO            | Benchmarking Universal Single-Copy Orthologs                                                        |
| 402 | C                | cysteine                                                                                            |
| 403 | CEGMA            | Core Eukaryotic Genes Mapping Approach                                                              |
| 404 | Da               | Dalton                                                                                              |
| 405 | FDR              | false discovery rate                                                                                |
| 406 | kbp              | kilo base pairs                                                                                     |
| 407 | kDa              | kilodaton                                                                                           |
| 408 | M                | methionine                                                                                          |
| 409 | Mbp              | mega base pairs                                                                                     |
| 410 | MW               | molecular weight                                                                                    |
| 411 | N                | asparagine                                                                                          |
| 412 | NP <sub>10</sub> | proposed metric of the median molecular weight of proteins that had greater than or equal           |
| 413 |                  | unique peptides identified to the 10 <sup>th</sup> -decile of unique peptides per protein; notation |
| 414 |                  | derived from <u>number of peptides in 10<sup>th</sup>-decile</u>                                    |
| 415 | NIST             | National Institute of Standards and Technology                                                      |
| 416 | Q                | glutamine                                                                                           |

417

418 **Consent for publication**

419 Not applicable.

420

421 **Competing interests**

422 The authors declare they have no competing interests.

423

424

425 **Funding**

426 All authors were funded by the National Institute of Standards and Technology.

427

428 **Authors' contributions**

429 All authors helped conceived of the study, developed methodology and assisted in reviewing the

430 manuscript. DE and WD selected and processed samples for proteomic analysis and collected data. BN

431 analyzed the data and wrote the initial manuscript draft.

432

433 **Acknowledgements**

434 Specimens used for this study were collected by Wayne E. McFee (National Oceanic and Atmospheric

435 Administration, National Ocean Service, National Centers for Coastal Ocean Science) and William A.

436 McLellan (University of North Carolina, Wilmington) and provided by the National Marine Mammal

437 Tissue Bank, which is maintained as part of the Marine Environmental Specimen Bank at NIST and is

438 operated under the direction of NMFS and in collaboration with USGS, USFWS, BOEMRE (formerly

439 MMS), and NIST through the Marine Mammal Health and Stranding Response Program. All samples

440 were collected under approved permits issued to the MMHSRP (responsible party: Dr. Teri Rowles) and

441 all sampling protocols were reviewed and approved by a NOAA/NMFS *ad hoc* Institutional Animal Care

442 and Use Committee (IACUC). The authors wish to thank Michael G. Janech and staff at NIST for critical

443 feedback.

444

445 **Disclaimer**

446 Identification of certain commercial equipment, instruments, software or materials does not imply

447 recommendation or endorsement by the National Institute of Standards and Technology, nor does it imply

448 that the products identified are necessarily the best available for the purpose.

449

450

451 **Figure Legends**

452 **Figure 1. Overlap and unique protein identifications by *T. truncatus* tissue.** Proteins unique to each  
453 tissue and shared by all tissues are shown along with the total number of proteins identified in each  
454 analysis.

455  
456 **Figure 2. Descriptive statistics of identified proteins using different annotations.** The NP<sub>10</sub> molecular  
457 weight improved 21.3 % from 67.59 kDa to 81.99 kDa (indicated by the red dotted line) along with an  
458 improvement in median molecular weight of inferred proteins across genes with minor and major  
459 changes. (note: these axes have been truncated for illustration and do not show all data points.)

460  
461 **Figure 3. Confirming improved annotation of former partial proteins.** Proteins that were partial in  
462 the Ttru\_1.4 annotation were improved in the NIST annotation, and there was mass spectrometric  
463 evidence to support the accuracy of these improvements corresponding to increased peptide  
464 identifications and median molecular weight (the latter indicated by the red dotted line; note: these axes  
465 have been truncated for illustration and do not show all data points.)

466  
467 **Figure 4. Source of peptide identification differences using the two assemblies.** There was strong  
468 overlap of identified peptides using the two assemblies with over 80 % overlap. The sources of the  
469 differences were largely comprised of deprecated proteins in Ttru\_1.4 (41 % of the 5 657) and  
470 minor/major changes in NIST\_Tur\_tru\_v1 (96 % of the 4 768).

471  
472 **Figure 5. Similar trends with improved human assemblies.** As the contiguity of the human genome  
473 has improved, there is a shift upward and to the right indicating annotations are more accurate (increased  
474 coverage) and complete (increased molecular weight). The NP<sub>10</sub> improved 33 % and is indicated by the  
475 red dotted line (note: these axes have been truncated for illustration and do not show all data points).

476

477 **References**

- 478 1. Bickhart DM, Rosen BD, Koren S, Sayre BL, Hastie AR, Chan S, et al. Single-molecule  
479 sequencing and chromatin conformation capture enable de novo reference assembly of the  
480 domestic goat genome. *Nature genetics*. 2017;49 4:643-50. doi:10.1038/ng.3802.
- 481 2. Worley KC. A golden goat genome. *Nature genetics*. 2017;49 4:485-6. doi:10.1038/ng.3824.
- 482 3. Mohr DW, Naguib A, Weisenfeld N, Kumar V, Shah P, Church DM, et al. Improved de novo  
483 Genome Assembly: Linked-Read Sequencing Combined with Optical Mapping Produce a High  
484 Quality Mammalian Genome at Relatively Low Cost. *bioRxiv*. 2017:128348.
- 485 4. Richards S. It's More Than Stamp Collecting: How Genome Sequencing Can Unify Biological  
486 Research. *Trends in genetics : TIG*. 2015;31 7:411-21. doi:10.1016/j.tig.2015.04.007.
- 487 5. Bradnam KR, Fass JN, Alexandrov A, Baranay P, Bechner M, Birol I, et al. Assemblathon 2:  
488 evaluating de novo methods of genome assembly in three vertebrate species. *GigaScience*. 2013;2  
489 1:10. doi:10.1186/2047-217x-2-10.
- 490 6. Putnam NH, O'Connell BL, Stites JC, Rice BJ, Blanchette M, Calef R, et al. Chromosome-scale  
491 shotgun assembly using an in vitro method for long-range linkage. *Genome research*. 2016;26  
492 3:342-50. doi:10.1101/gr.193474.115.
- 493 7. Simao FA, Waterhouse RM, Ioannidis P, Kriventseva EV and Zdobnov EM. BUSCO: assessing  
494 genome assembly and annotation completeness with single-copy orthologs. *Bioinformatics*  
495 (Oxford, England). 2015;31 19:3210-2. doi:10.1093/bioinformatics/btv351.
- 496 8. Parra G, Bradnam K and Korf I. CEGMA: a pipeline to accurately annotate core genes in  
497 eukaryotic genomes. *Bioinformatics (Oxford, England)*. 2007;23 9:1061-7.  
498 doi:10.1093/bioinformatics/btm071.
- 499 9. Parra G, Bradnam K, Ning Z, Keane T and Korf I. Assessing the gene space in draft genomes.  
500 *Nucleic Acids Res*. 2009;37 1:289-97. doi:10.1093/nar/gkn916.

- 501 10. Lam H, Deutsch EW, Edes JS, Eng JK, Stein SE and Aebersold R. Building consensus spectral  
502 libraries for peptide identification in proteomics. *Nature methods*. 2008;5 10:873-5.  
503 doi:10.1038/nmeth.1254.
- 504 11. Burke MC, Mirokhin YA, Tchekhovskoi DV, Markey SP, Heidbrink Thompson J, Larkin C, et  
505 al. The Hybrid Search: A Mass Spectral Library Search Method for Discovery of Modifications  
506 in Proteomics. *Journal of proteome research*. 2017;16 5:1924-35.
- 507 12. Zhang Z, Burke M, Mirokhin YA, Tchekhovskoi DV, Markey SP, Yu W, et al. Reverse and  
508 Random Decoy Methods for False Discovery Rate Estimation in High Mass Accuracy Peptide  
509 Spectral Library Searches. *Journal of proteome research*. 2018;  
510 doi:10.1021/acs.jproteome.7b00614.
- 511 13. Bekker-Jensen DB, Kelstrup CD, Batth TS, Larsen SC, Haldrup C, Bramsen JB, et al. An  
512 Optimized Shotgun Strategy for the Rapid Generation of Comprehensive Human Proteomes. *Cell*  
513 *systems*. 2017;4 6:587-99.e4. doi:10.1016/j.cels.2017.05.009.
- 514 14. Foote AD, Liu Y, Thomas GW, Vinar T, Alfoldi J, Deng J, et al. Convergent evolution of the  
515 genomes of marine mammals. *Nature genetics*. 2015;47 3:272-5. doi:10.1038/ng.3198.
- 516 15. Sobolesky P, Parry C, Boxall B, Wells R, Venn-Watson S and Janech MG. Proteomic Analysis of  
517 Non-depleted Serum Proteins from Bottlenose Dolphins Uncovers a High Vanin-1 Phenotype.  
518 *Scientific reports*. 2016;6:33879. doi:10.1038/srep33879.
- 519 16. Jones SJ, Taylor GA, Chan S, Warren RL, Hammond SA, Bilobram S, et al. The Genome of the  
520 Beluga Whale (*Delphinapterus leucas*). *Genes*. 2017;8 12:378. doi:10.3390/genes8120378.
- 521 17. Lindblad-Toh K, Garber M, Zuk O, Lin MF, Parker BJ, Washietl S, et al. A high-resolution map  
522 of human evolutionary constraint using 29 mammals. *Nature*. 2011;478 7370:476-82.  
523 doi:10.1038/nature10530.
- 524 18. Pruitt KD, Brown GR, Hiatt SM, Thibaud-Nissen F, Astashyn A, Ermolaeva O, et al. RefSeq: an  
525 update on mammalian reference sequences. *Nucleic Acids Res*. 2014;42 Database issue:D756-63.  
526 doi:10.1093/nar/gkt1114.

- 527 19. NCBI *Tursiops truncatus* Annotation Release 101 Annotation Report.  
528 [https://www.ncbi.nlm.nih.gov/genome/annotation\\_euk/Tursiops\\_truncatus/101/](https://www.ncbi.nlm.nih.gov/genome/annotation_euk/Tursiops_truncatus/101/). Accessed 13  
529 January 2017.
- 530 20. Shamsi A and Bano B. Journey of cystatins from being mere thiol protease inhibitors to at heart  
531 of many pathological conditions. International journal of biological macromolecules.  
532 2017;102:674-93. doi:10.1016/j.ijbiomac.2017.04.071.
- 533 21. Neely BA, Carlin KP, Arthur JM, McFee WE and Janech MG. Ratiometric Measurements of  
534 Adiponectin by Mass Spectrometry in Bottlenose Dolphins (*Tursiops truncatus*) with Iron  
535 Overload Reveal an Association with Insulin Resistance and Glucagon. Frontiers in  
536 endocrinology. 2013;4:132. doi:10.3389/fendo.2013.00132.
- 537 22. Deutsch EW, Csordas A, Sun Z, Jarnuczak A, Perez-Riverol Y, Ternent T, et al. The  
538 ProteomeXchange consortium in 2017: supporting the cultural change in proteomics public data  
539 deposition. Nucleic Acids Research. 2017;45 D1:D1100-D6. doi:10.1093/nar/gkw936.
- 540 23. Vizcaíno JA, Deutsch EW, Wang R, Csordas A, Reisinger F, Ríos D, et al. ProteomeXchange  
541 provides globally co-ordinated proteomics data submission and dissemination. Nature  
542 biotechnology. 2014;32 3:223-6. doi:10.1038/nbt.2839.
- 543 24. Neely BA, Soper JL, Gulland FM, Bell PD, Kindy M, Arthur JM, et al. Proteomic analysis of  
544 cerebrospinal fluid in California sea lions (*Zalophus californianus*) with domoic acid toxicosis  
545 identifies proteins associated with neurodegeneration. Proteomics. 2015;15 23-24:4051-63.  
546 doi:10.1002/pmic.201500167.
- 547 25. Ordonez YN, Anton RF and Davis WC. Quantification of total serum transferrin and transferrin  
548 sialoforms in human serum; an alternative method for the determination of carbohydrate-deficient  
549 transferrin in clinical samples. Analytical Methods. 2014;6 12:3967-74.  
550 doi:10.1039/C4AY00159A.

- 551 26. Johnson SP, Venn-Watson SK, Cassle SE, Smith CR, Jensen ED and Ridgway SH. Use of  
552 phlebotomy treatment in Atlantic bottlenose dolphins with iron overload. *Journal of the American*  
553 *Veterinary Medical Association*. 2009;235 2:194-200. doi:10.2460/javma.235.2.194.
- 554 27. Leon IR, Schwammle V, Jensen ON and Sprenger RR. Quantitative assessment of in-solution  
555 digestion efficiency identifies optimal protocols for unbiased protein analysis. *Molecular &*  
556 *cellular proteomics : MCP*. 2013;12 10:2992-3005. doi:10.1074/mcp.M112.025585.
- 557 28. Bryk AH and Wisniewski JR. Quantitative Analysis of Human Red Blood Cell Proteome. *Journal*  
558 *of proteome research*. 2017; doi:10.1021/acs.jproteome.7b00025.
- 559 29. Martens L and Vizcaino JA. A Golden Age for Working with Public Proteomics Data. *Trends in*  
560 *biochemical sciences*. 2017;42 5:333-41. doi:10.1016/j.tibs.2017.01.001.
- 561 30. Jagtap PD, Johnson JE, Onsongo G, Sadler FW, Murray K, Wang Y, et al. Flexible and  
562 accessible workflows for improved proteogenomic analysis using the Galaxy framework. *Journal*  
563 *of proteome research*. 2014;13 12:5898-908. doi:10.1021/pr500812t.
- 564 31. Sheynkman GM, Johnson JE, Jagtap PD, Shortreed MR, Onsongo G, Frey BL, et al. Using  
565 Galaxy-P to leverage RNA-Seq for the discovery of novel protein variations. *BMC genomics*.  
566 2014;15:703. doi:10.1186/1471-2164-15-703.
- 567 32. Pugh RS, Becker PR, Porter BJ, Ellisor MB, Moors AJ and Wise SA. Design and Applications of  
568 the National Institute of Standards and Technology's (NIST's) Environmental Specimen Banking  
569 Programs. *Cell Preservation Technology*. 2008;6 1:59-72. doi:10.1089/cpt.2007.0517.
- 570 33. NCBI RefSeq. <ftp://ftp.ncbi.nih.gov/genomes/refseq/>. Accessed 28 June 2017.
- 571 34. Clark K, Karsch-Mizrachi I, Lipman DJ, Ostell J and Sayers EW. GenBank. *Nucleic Acids Res*.  
572 2016;44 D1:D67-72. doi:10.1093/nar/gkv1276.

573

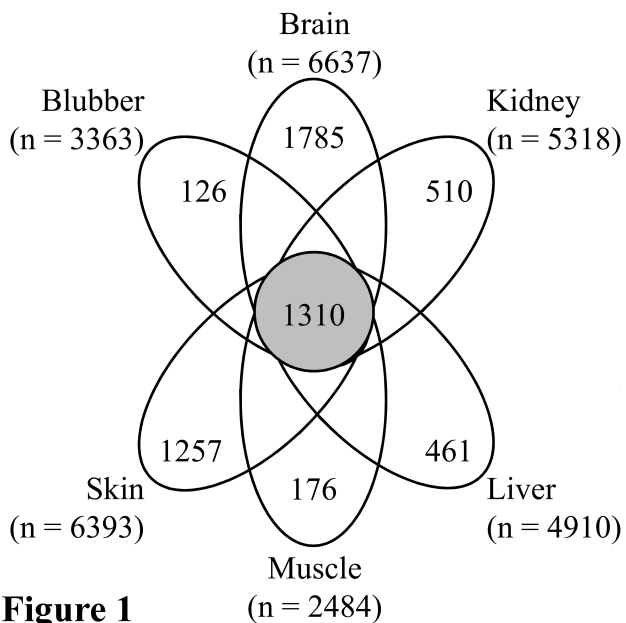



**Ttru 1.4****NIST Tur tru v1**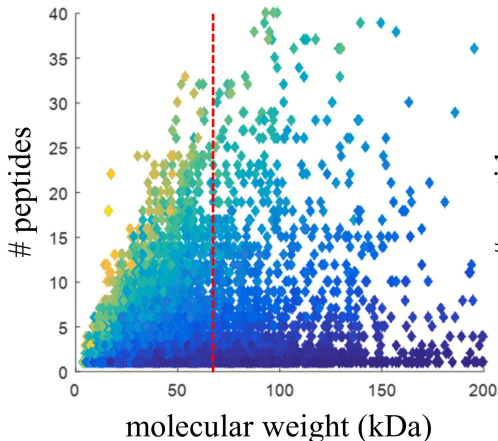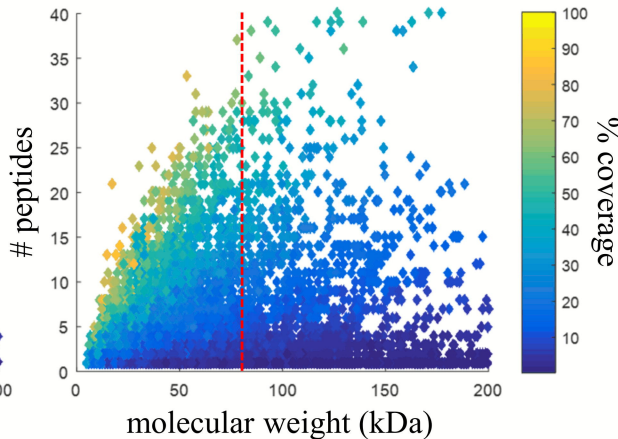

| NCBI RefSeq<br>category | <u>Relative %</u> |              | <u>Median MW (kDa)</u> |                        |
|-------------------------|-------------------|--------------|------------------------|------------------------|
|                         | Ttru 1.4          | NIST         | Ttru 1.4               | NIST ( $\Delta$ )      |
| new                     | NA                | 1.8 %        | NA                     | 20.42                  |
| minor                   | 55.5 %            | 65.5 %       | 47.24                  | 59.07 (+25.0 %)        |
| major                   | 24.8 %            | 31.5 %       | 36.97                  | 41.08 (+11.1 %)        |
| identical               | 0.6 %             | 0.4 %        | 34.65                  | 33.59 (-3.1 %)         |
| other                   | 0.9 %             | 0.7 %        | 66.67                  | 40.28 (-39.6 %)        |
| deprecated              | 18.0 %            | NA           | 28.66                  | NA                     |
| YP-prefix               | 0.2 %             | 0.1 %        | 35.76                  | 35.76 (0.0 %)          |
|                         |                   | <b>total</b> | <b>41.07</b>           | <b>52.26 (+27.3 %)</b> |

**Figure 2**

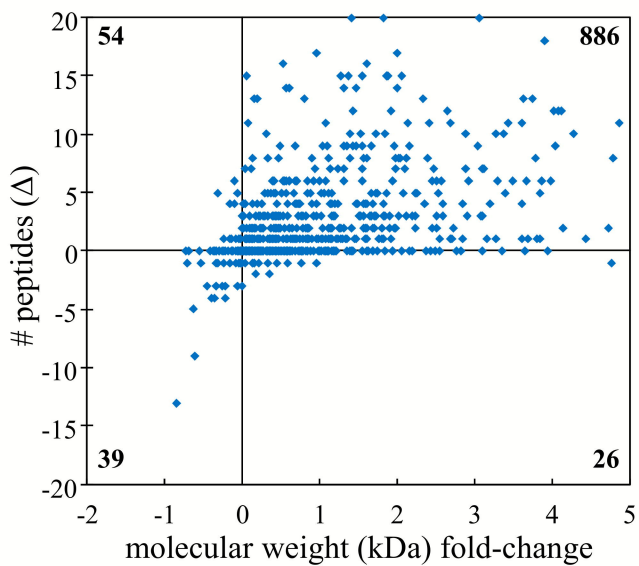

**Ttru 1.4**

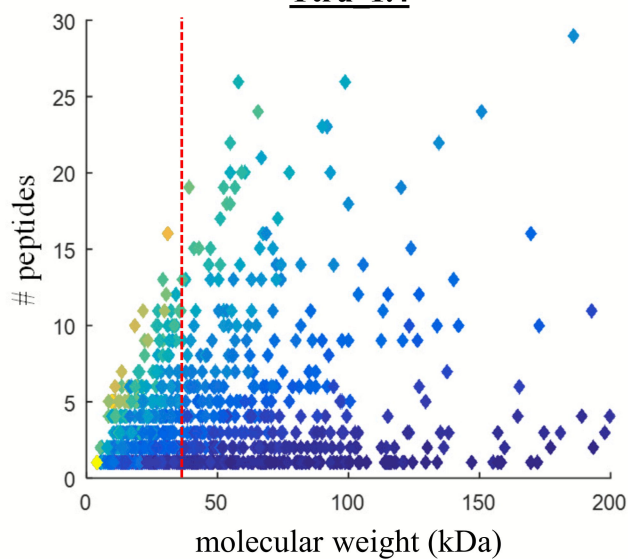

**NIST Tur tru v1**

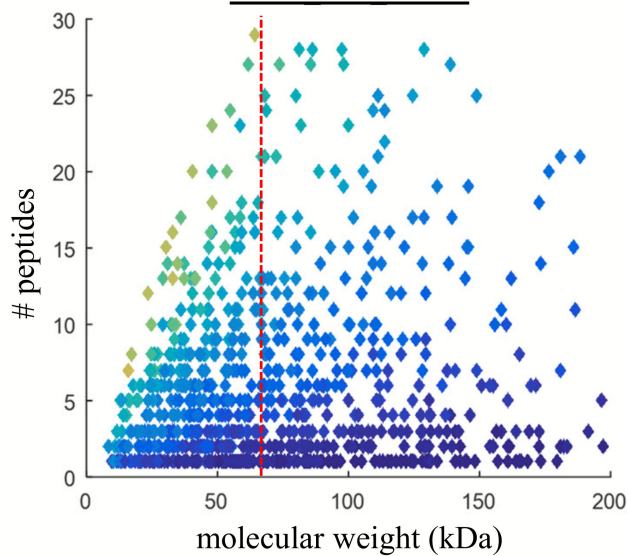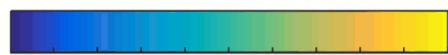

0 10 20 30 40 50 60 70 80 90 100

**Figure 3**

% coverage

**Figure 4**

Ttru\_1.4  
(n = 28 293)

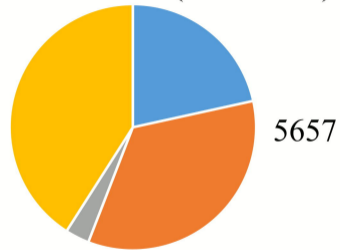

minor major  
other deprecated

5657

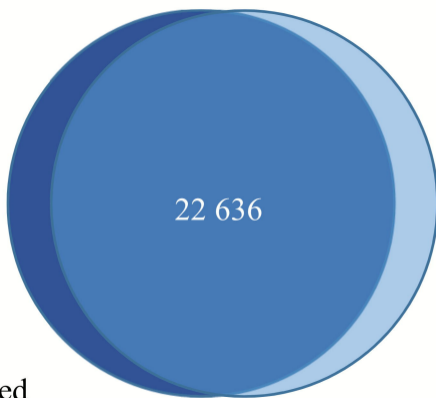

22 636

NIST\_Tur\_tru v1  
(n = 27 404)

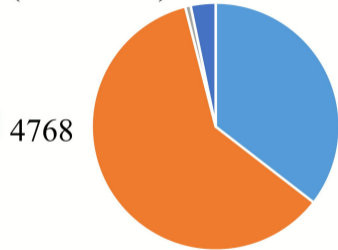

minor major  
other new

4768

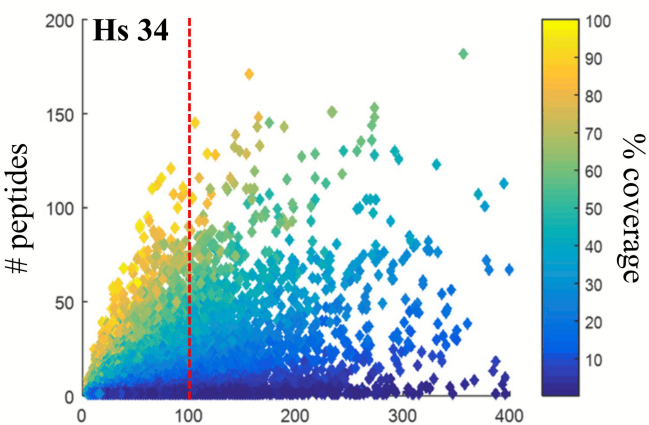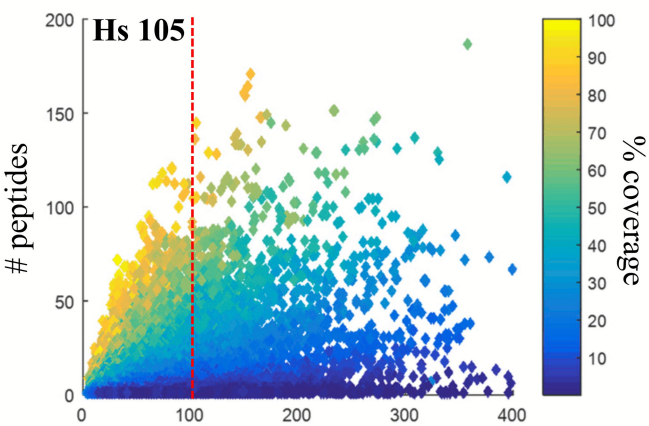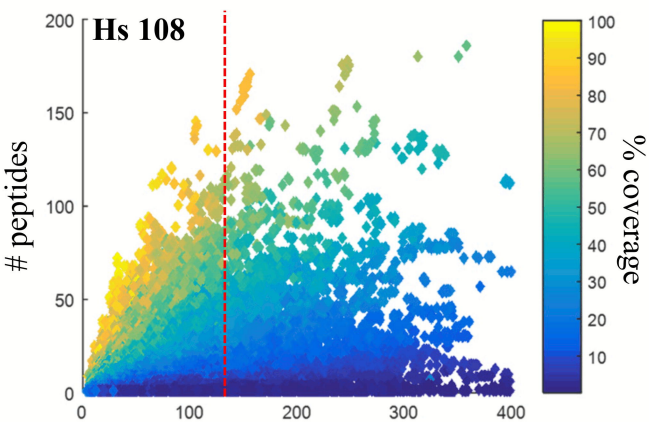

**Figure 5** molecular weight (kDa)
